# Supplementary material for: Shotgun proteomics reveals physiological response to ocean acidification in Crassostrea gigas
Source: PubMed Central journal article supplement (PMC4531390; doi:10.1186/1471-2164-15-951), 2014-11-03

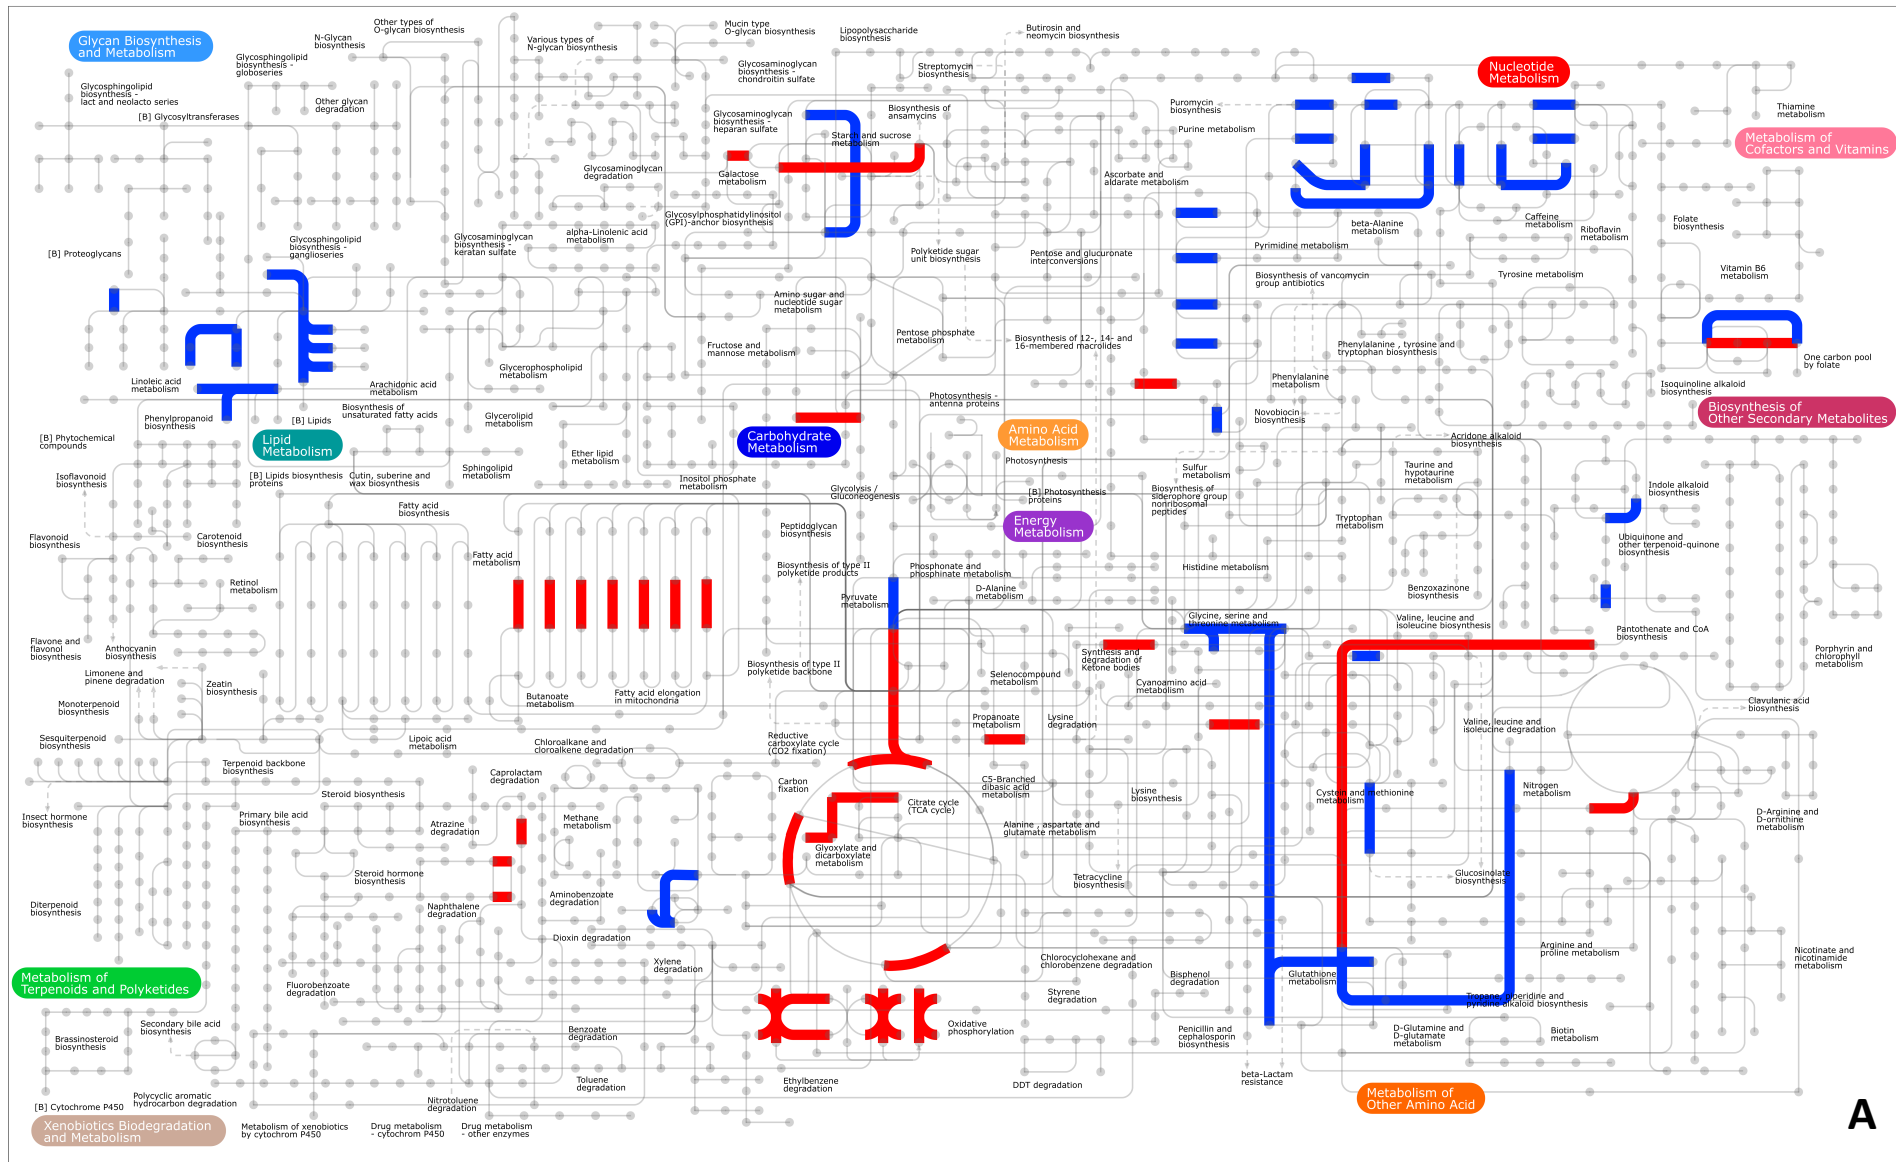

A

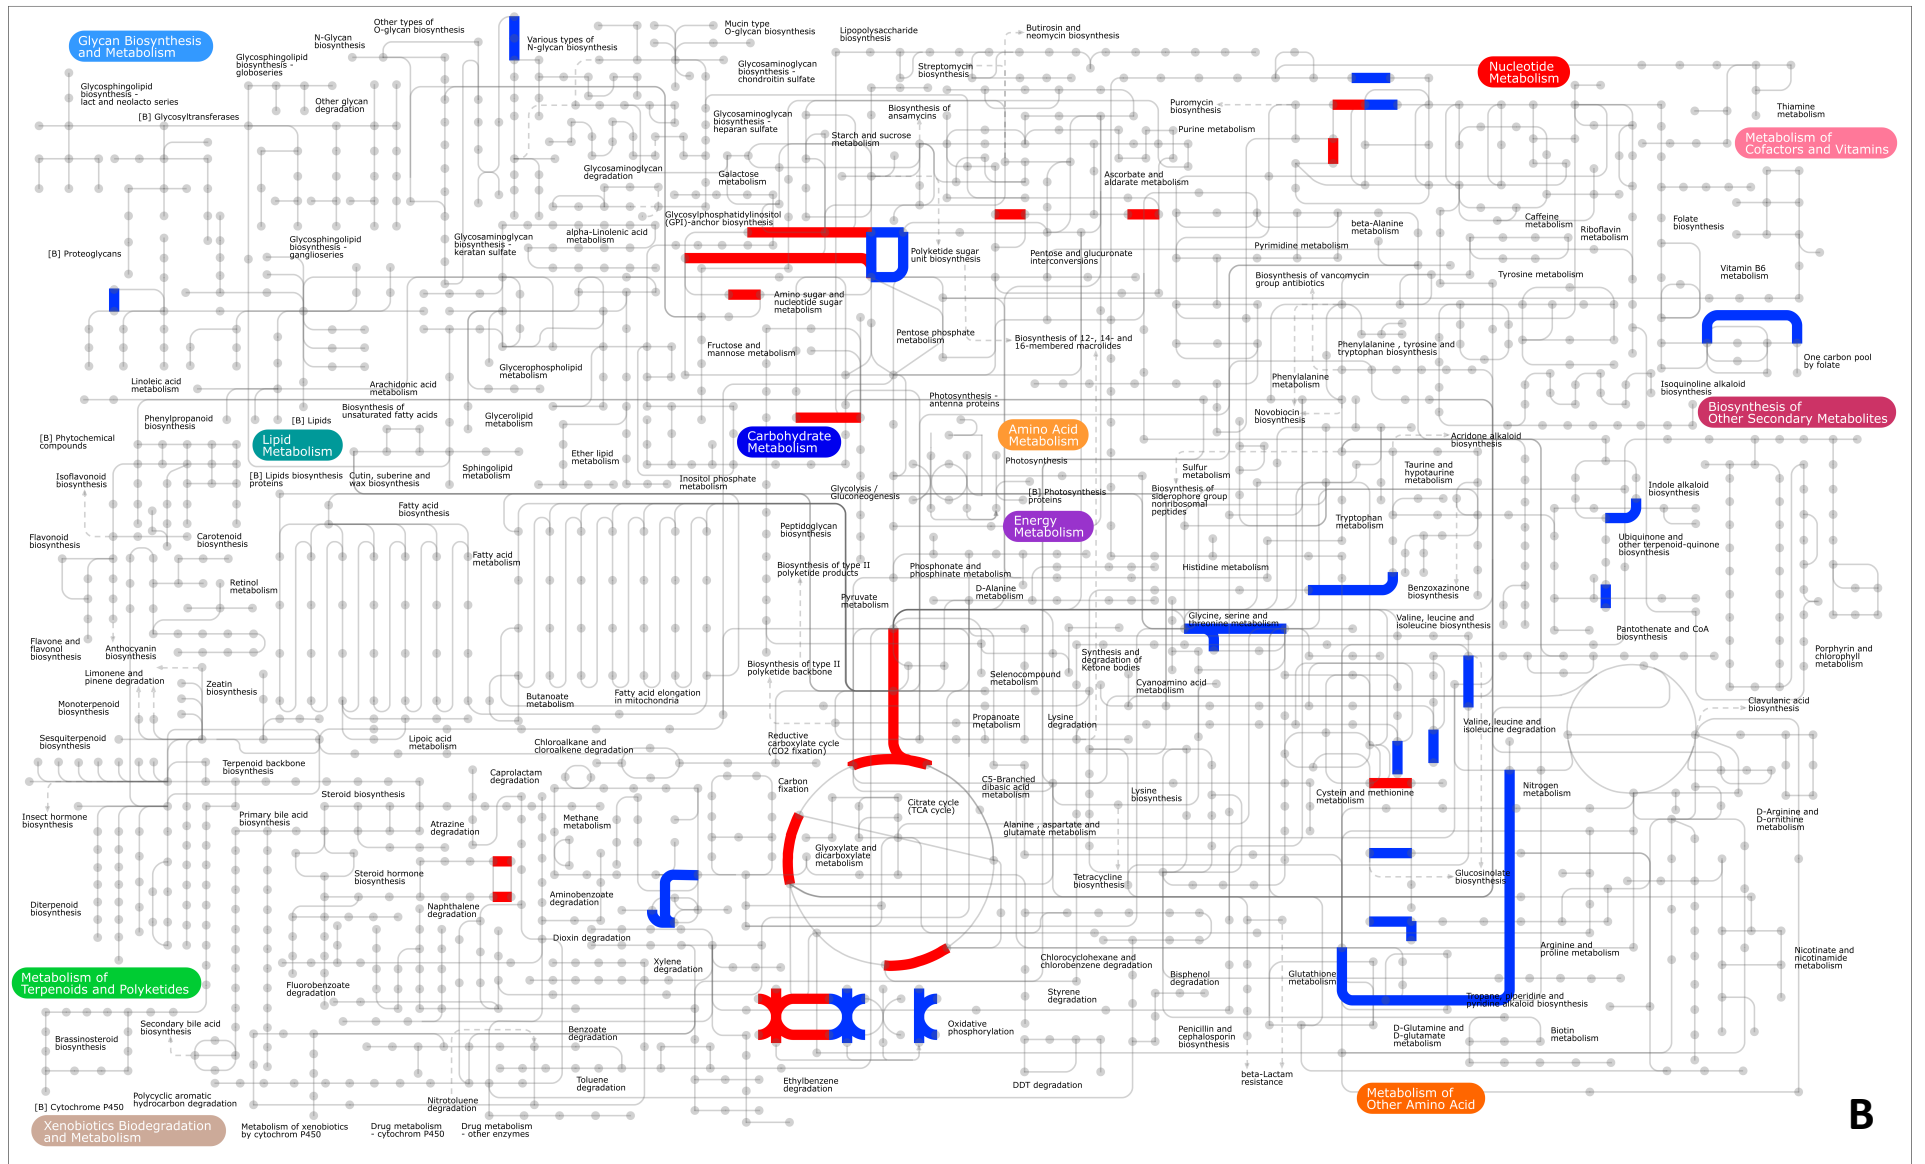

B

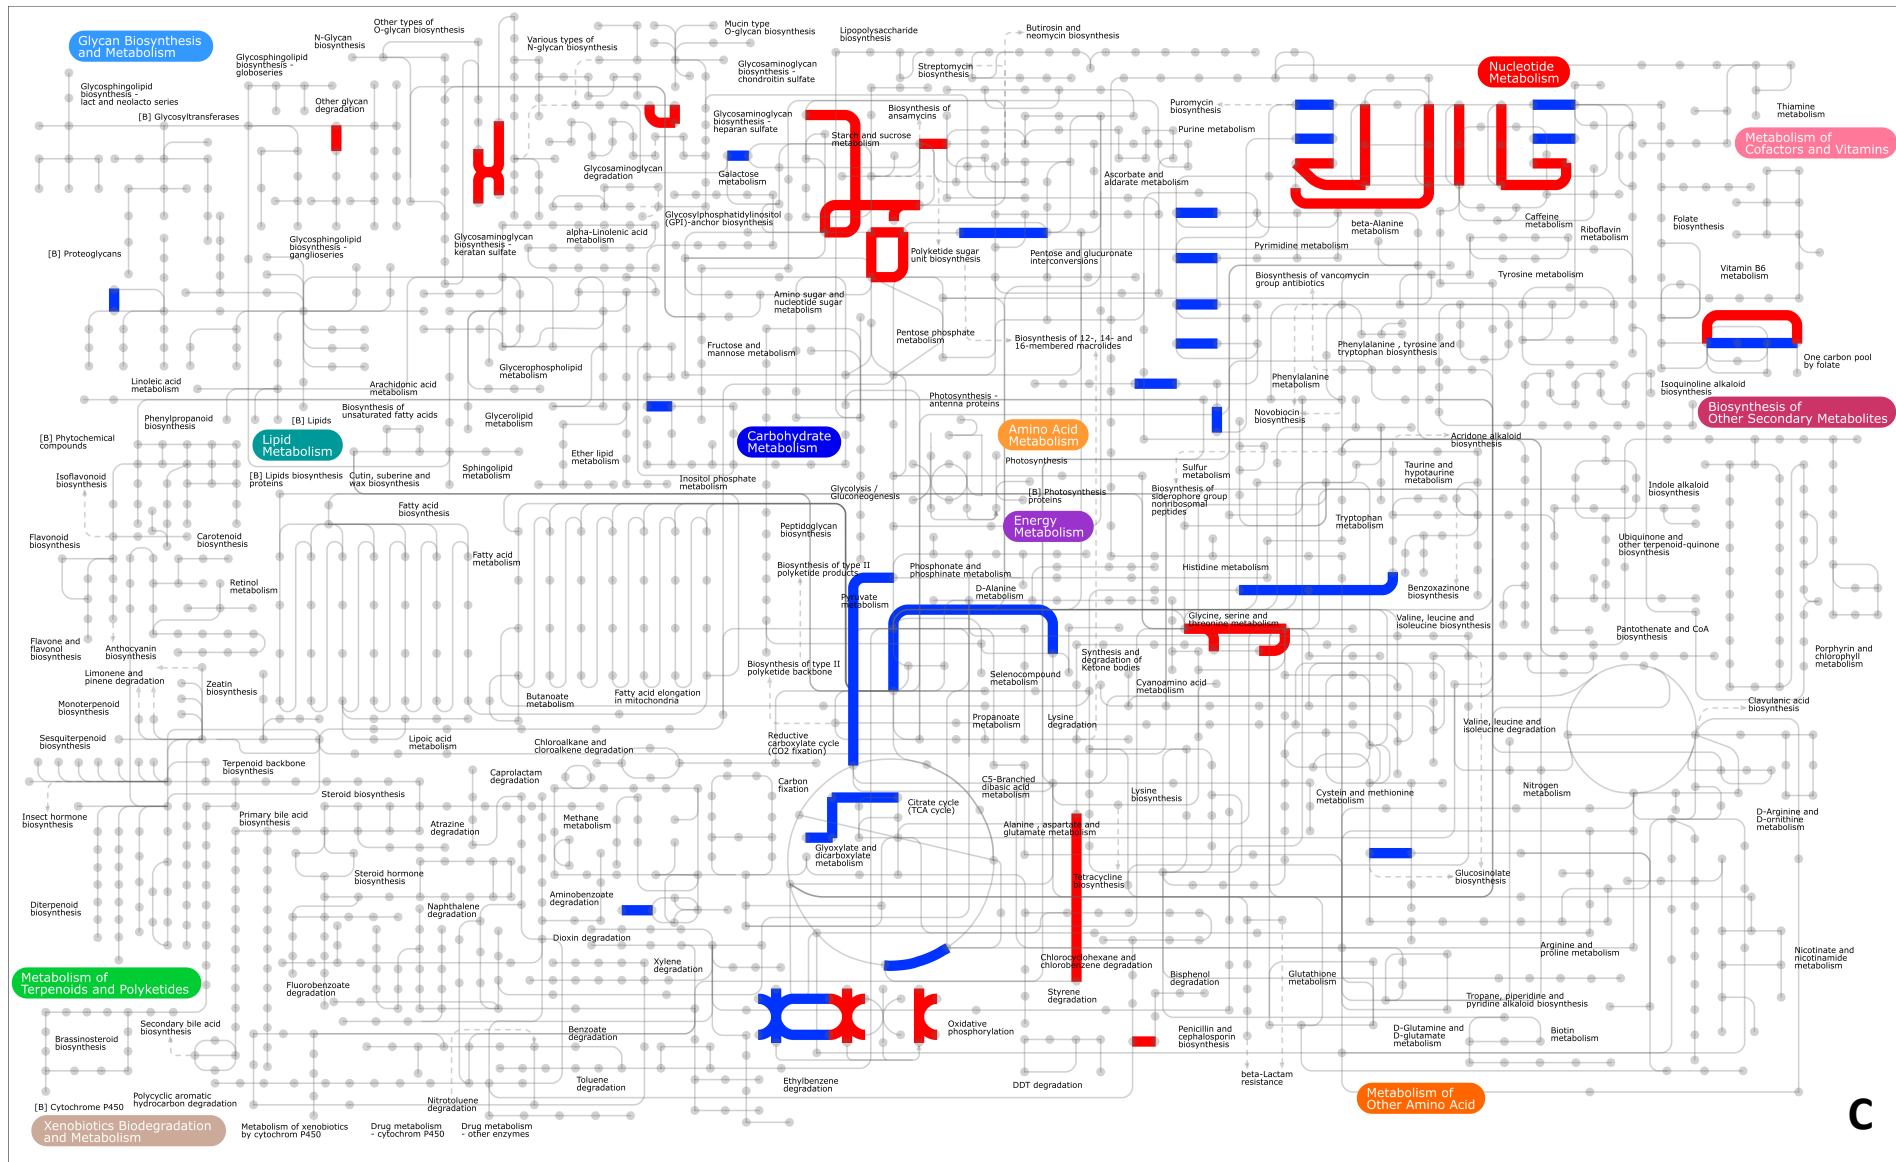

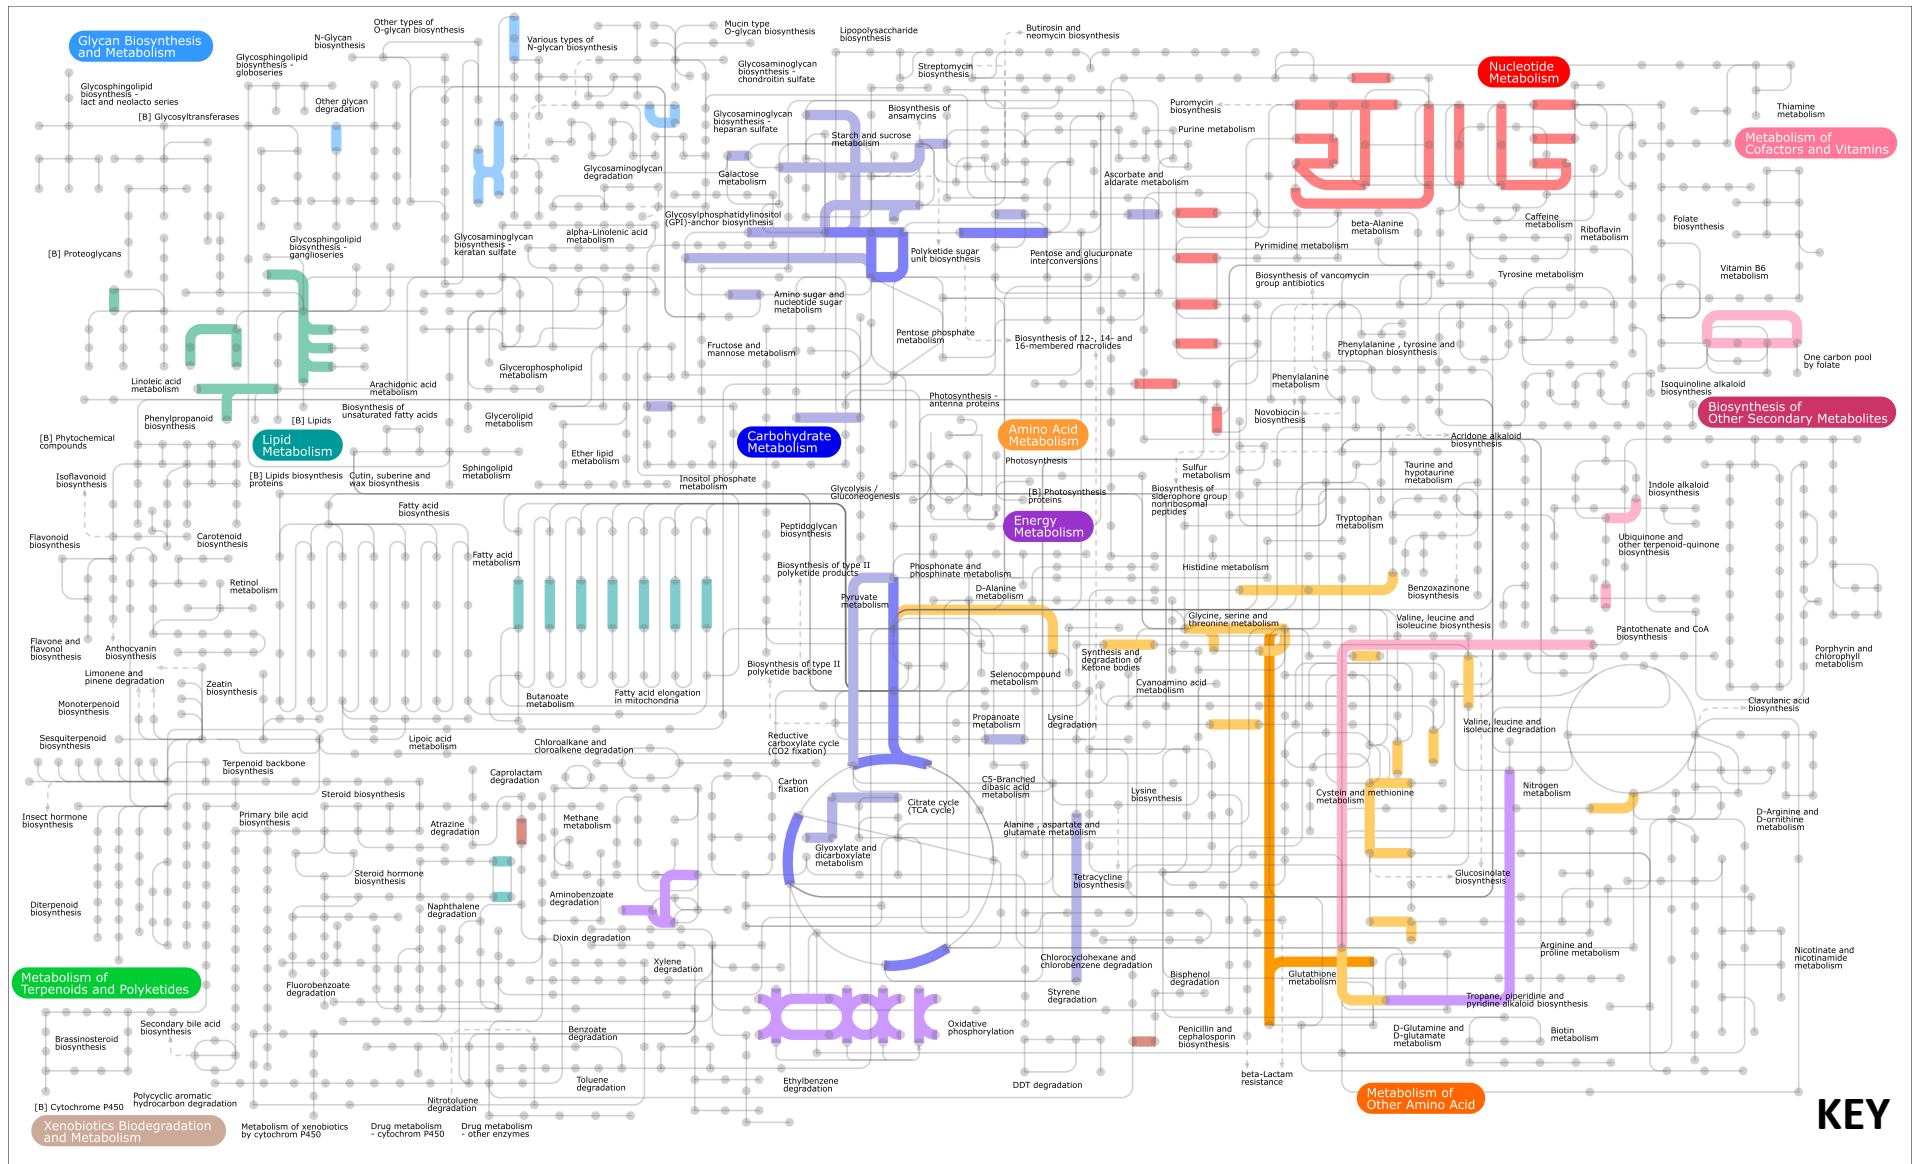

Supplement: 12864_2014_7071_MOESM6_ESM.pdf [file 12864_2014_7071_MOESM6_ESM.pdf]
